# Supplementary material for: Synthesis of Hydrophobic Nanosized Silicon Dioxide with a Spherical Particle Shape and Its Application in Fire-Extinguishing Powder Compositions Based on Struvite
Source: Nanomaterials (Basel). 2023 Mar 27;13(7):1186. doi: 10.3390/nano13071186 (PMC10096559; doi:10.3390/nano13071186)
Supplement: Supplementary file 1 [file nanomaterials-13-01186-s001.zip › nanomaterials-2292981-supplementary.pdf]

## Supporting information

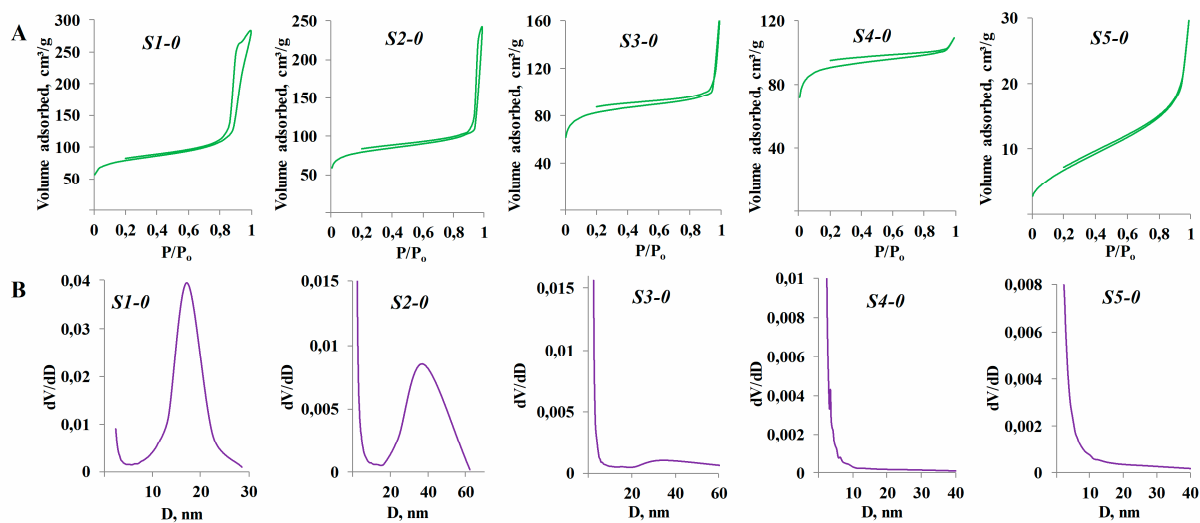

**Figure S1.** Sorption-desorption isotherms (A); pore size distribution in the initial  $\text{SiO}_2$  samples, with different  $[\text{H}_2\text{O}]/[\text{TEOS}]$  ratio (B).

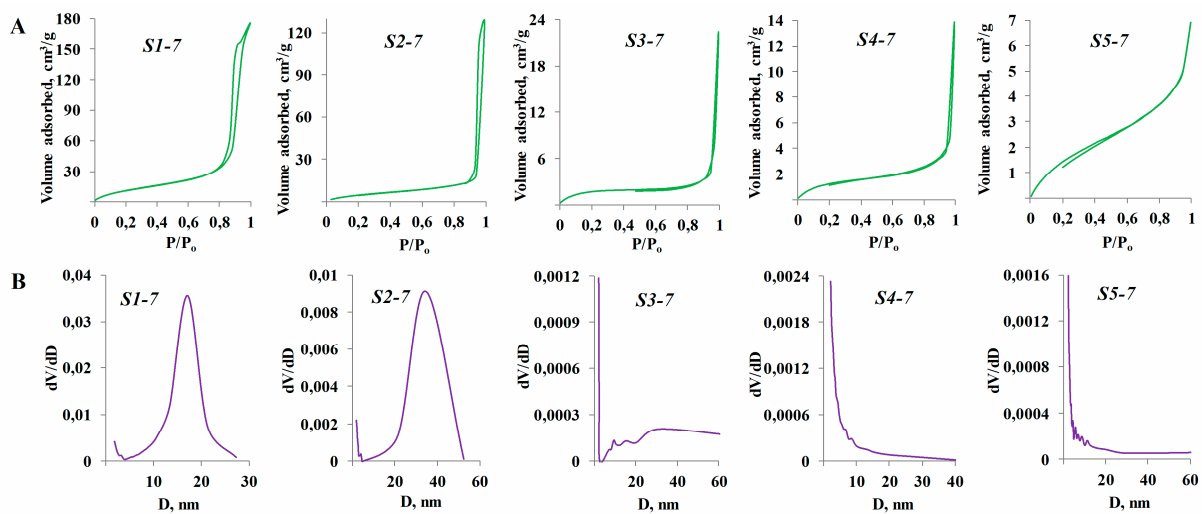

**Figure S2.** Sorption-desorption isotherms (A); pore size distribution in  $\text{SiO}_2$  samples hydrophobized with 7% PMHS and with different particle sizes (B).
